# Supplementary material
Source: PubMed Central journal article supplement (PMC1890489)
Supplement: pnas_0702866104_2.pdf [file pnas_0702866104_2.pdf]

**A**

Basal      +Thapsigargin

YFP-  
STIM1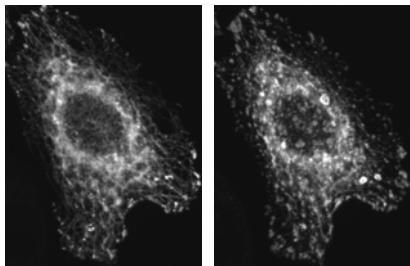FRET<sub>E</sub>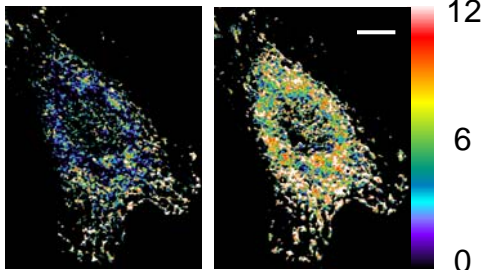

HeLa cells

**B**

Basal      +Thapsigargin

YFP-  
STIM1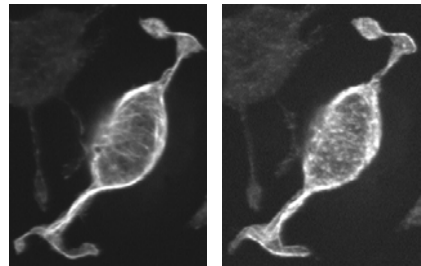FRET<sub>E</sub>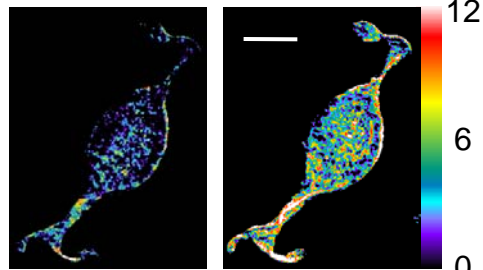

RBL cells
