# Supplementary material
Source: PubMed Central journal article supplement (PMC1890489)
Supplement: pnas_0702866104_6.pdf [file pnas_0702866104_6.pdf]

|         |       |       |       |        |
|---------|-------|-------|-------|--------|
| Human   | STIM1 | RKKFP | LKIFK | KPLKK  |
| Murine  | STIM1 | RKKFP | LKIFK | KPLKK  |
| Bovine  | STIM1 | RKKFP | LKIFK | KPLKK  |
| Xenopus | STIM1 | KKKLT | LKIFK | KP. KK |
