# Supplementary material
Source: PubMed Central journal article supplement (PMC1890489)

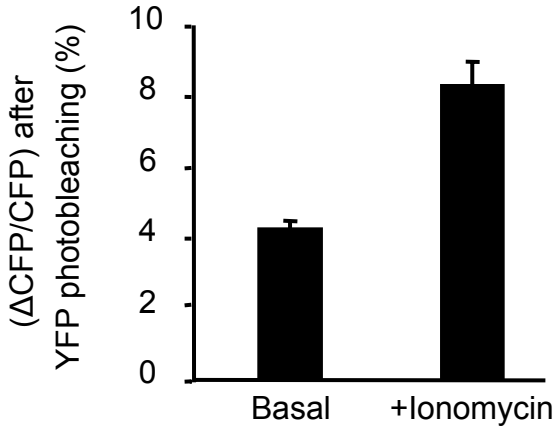

Supplement: pnas_0702866104_1.pdf [file pnas_0702866104_1.pdf]

Basal

Store  
depleted

Store  
refilled

YFP-  
STIM1

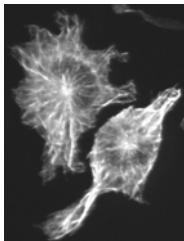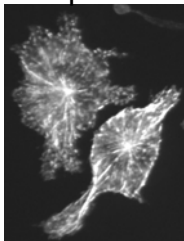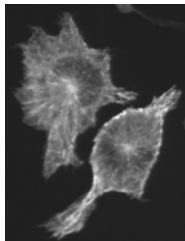

FRET<sub>E</sub>

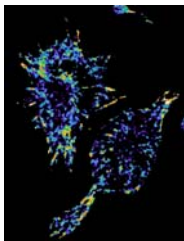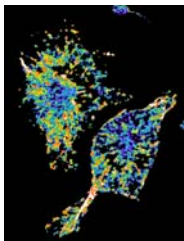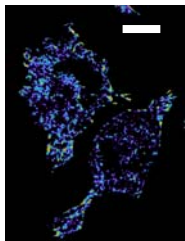

20

10

0

Supplement: pnas_0702866104_3.pdf [file pnas_0702866104_3.pdf]

Basal

+Ionomycin  
25min

YFP-  
STIM1

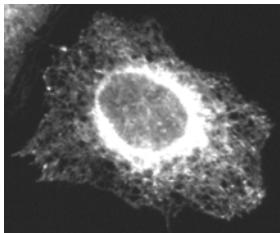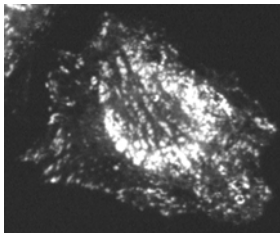

CFP-  
ER

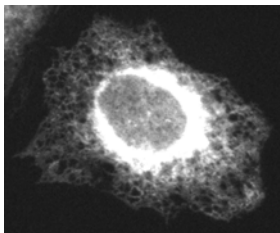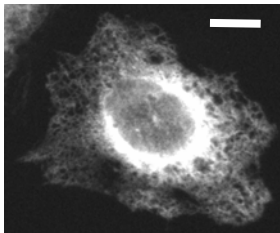

Supplement: pnas_0702866104_4.pdf [file pnas_0702866104_4.pdf]

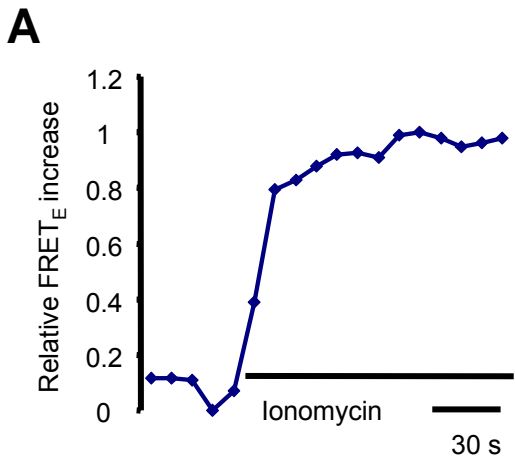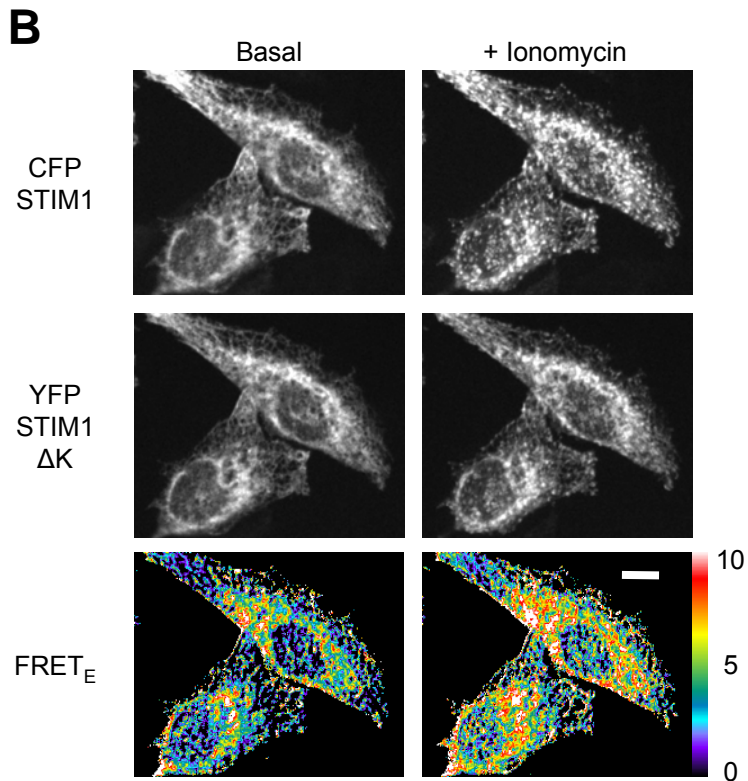

Supplement: pnas_0702866104_5.pdf [file pnas_0702866104_5.pdf]
